# Supplementary material
Source: PubMed Central journal article supplement (PMC7253020)
Supplement: jciinsight-5-136368-s149.pdf [file jciinsight-5-136368-s149.pdf]

## **Neo-antigen based EpiGVAX vaccine initiates anti-tumor immunity in colorectal cancer**

Victoria M. Kim<sup>1,2,3\*</sup>, Xingyi Pan<sup>1,2\*</sup>, Kevin C. Soares<sup>1,2,3\*</sup>, Nilofer S Azad<sup>1,2</sup>, Nita Ahuja<sup>1,3</sup>, Christopher J. Gamper<sup>1,2</sup>, Alex B. Blair<sup>1,2,3</sup>, Stephen Muth<sup>1,2</sup>, Ding Ding<sup>1,2</sup>, Brian H. Ladle<sup>1,2†</sup>, Lei Zheng<sup>1,2,3†</sup>

### **Supplement Materials:**

### **Methods:**

#### **Mouse IFN- $\gamma$ enzyme-linked immunosorbent assays (ELISA)**

CD8<sup>+</sup>T cells were isolated from tumor-bearing mice liver and spleen and co-cultured with autologous CT26-HA tumor cells irradiated with 50 Gy for 18 hours in AIMV medium (Thermo Fisher Scientific) at 37°C incubator with 5% CO<sub>2</sub>. Mouse IFN- $\gamma$  enzyme-linked immunosorbent assay (ELISA) Ready-Set-Go (eBioscience) was then conducted using the supernatant following the manufacturer's protocol.

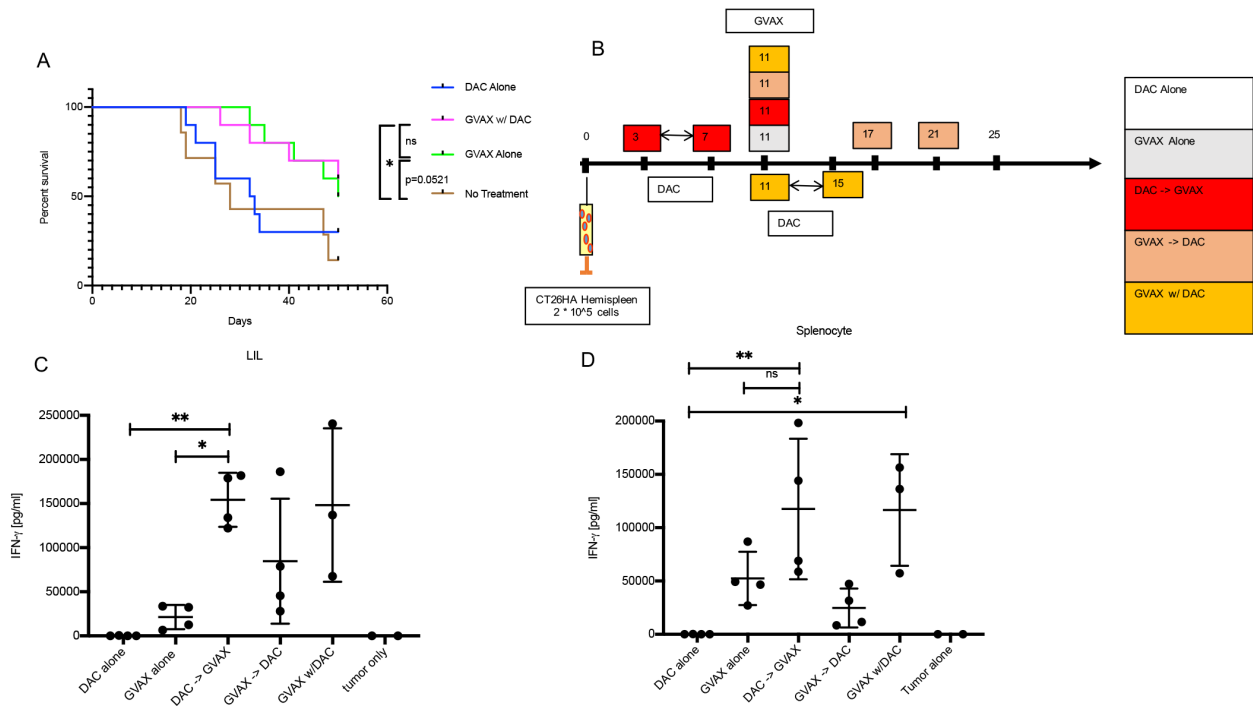

**Supplement Figure 1: Addition of Decitabine (DAC) to GVAX therapy did not improve its anti-tumor efficacy in a liver metastatic colorectal murine model.**

**GVAX+Pre-DAC regimen was adopted for further optimization. (A)**  $2 \times 10^5$  CT26

tumor cells were inoculated via a hemispleen surgery on day 0, mice were treated with GVAX at day 11, and DAC was dosed from day 11-15 for 5 days. Mice were followed up to 50 days for survival analysis. DAC alone ( $n=10$ ), Cy+DAC w/DAC ( $n=10$  mice),

Cy+DAC ( $n=10$  mice), No treatment ( $n=7$  mice). Data represents one representative

experiment that was repeated twice. Survival statistical analysis was done by using log-

rank test adjusted by multiple testing. **\*\*** $p < 0.01$ ; **\*** $p < 0.05$ ; **ns**, not significant. **(B)**

Treatment schema to test the dosing schedules of DAC combined with GVAX in three

groups: DAC alone, GVAX alone, and GVAX + DAC.

different ways, mice were sacrificed at day 25. **(C) (D)** Mice were sacrificed on day 14 post-surgery. IFN- $\gamma$  ELISA was performed on both isolated liver infiltrating lymphocytes and splenocytes after co-culturing with irradiated CT26-HA cells for 72 hs. N=4 for all treatment groups except N=2 for tumor only group, N=3 for GVAX/DAC group. Multiple comparisons of unpaired one-way ANOVA test with Tukey p-value adjustment was used for statistical analysis. \*\*p < 0.01; \*p < 0.05; ns, non-significant.

**Table S1. Day 50 Interim Analysis of Mouse Survival**

| Treatment Groups   | Survival % at Day 50 | P value (versus GVAX w/DAC) by two-sided Chi-Square test |
|--------------------|----------------------|----------------------------------------------------------|
| DAC Alone (n=10)   | 30                   | ns                                                       |
| GVAX w/DAC (n=10)  | 70                   |                                                          |
| GVAX Alone (n=10)  | 60                   | ns                                                       |
| No treatment (n=7) | 10                   | **                                                       |

**Table S1. Day 50 Interim Analysis of Mouse Survival**

| Treatment Groups   | Survival % at Day 50 | P value (versus GVAX w/DAC) by two-sided Chi-Square test |
|--------------------|----------------------|----------------------------------------------------------|
| DAC Alone (n=10)   | 30                   | ns                                                       |
| GVAX w/DAC (n=10)  | 70                   |                                                          |
| GVAX Alone (n=10)  | 60                   | ns                                                       |
| No treatment (n=7) | 10                   | **                                                       |

\*\*\*\*p < 0.0001; \*\*p < 0.01; \*p < 0.05; ns, non-significant.

**Table S2. % Mice Develop Tumor at Day 25 Post Surgery**

| Treatment Groups (n=5) | % Mice with visible tumor (liver mets, peritoneal implants) | P value (versus DAC -> GVAX) by two-sided Chi-Square test |
|------------------------|-------------------------------------------------------------|-----------------------------------------------------------|
| Tumor Alone            | 100                                                         | ****                                                      |
| DAC Alone              | 60                                                          | ****                                                      |
| GVAX Alone             | 0                                                           | ns                                                        |
| DAC -> GVAX            | 0                                                           |                                                           |
| GVAX -> DAC            | 80                                                          | ****                                                      |
| GVAX w/DAC             | 20                                                          | ns                                                        |

**Table S2. % Mice Develop Tumor at Day 25 Post Surgery**

| Treatment Groups (n=5) | % Mice with visible tumor (liver mets, peritoneal implants) | P value (versus DAC -> GVAX) by two-sided Chi-Square test |
|------------------------|-------------------------------------------------------------|-----------------------------------------------------------|
| Tumor Alone            | 100                                                         | ****                                                      |
| DAC Alone              | 60                                                          | ****                                                      |
| GVAX Alone             | 0                                                           | ns                                                        |
| DAC -> GVAX            | 0                                                           |                                                           |
| GVAX -> DAC            | 80                                                          | ****                                                      |
| GVAX w/DAC             | 20                                                          | ns                                                        |

\*\*\*\*p < 0.0001; \*\*p < 0.01; \*p < 0.05; ns, non-significant.
